# Supplementary material for: Intramolecular alkyne–dithiolium cycloaddition: a joint experimental and DFT mechanistic study
Source: Royal Society of Chemistry journal article supplement (doi:10.1039/c7ra05087a), 2017-01-01
Supplement: c7ra05087a1.pdf [file c7ra05087a1.pdf]

*Supporting Information for*

# **Intramolecular alkyne–dithiolium cycloaddition: a joint experimental and DTF mechanistic study**

Cheng Wang, Christopher Flinn, and Yuming Zhao\*

Department of Chemistry, Memorial University, St. John's, NL, Canada A1B 3X7

Email: yuming@mun.ca

## **Table of Content**

|                                         |          |
|-----------------------------------------|----------|
| <b>1. NMR Spectra for New Compounds</b> | <b>2</b> |
| <b>2. Results of DTF Calculations</b>   | <b>8</b> |

## 1. NMR Spectra for New Compounds

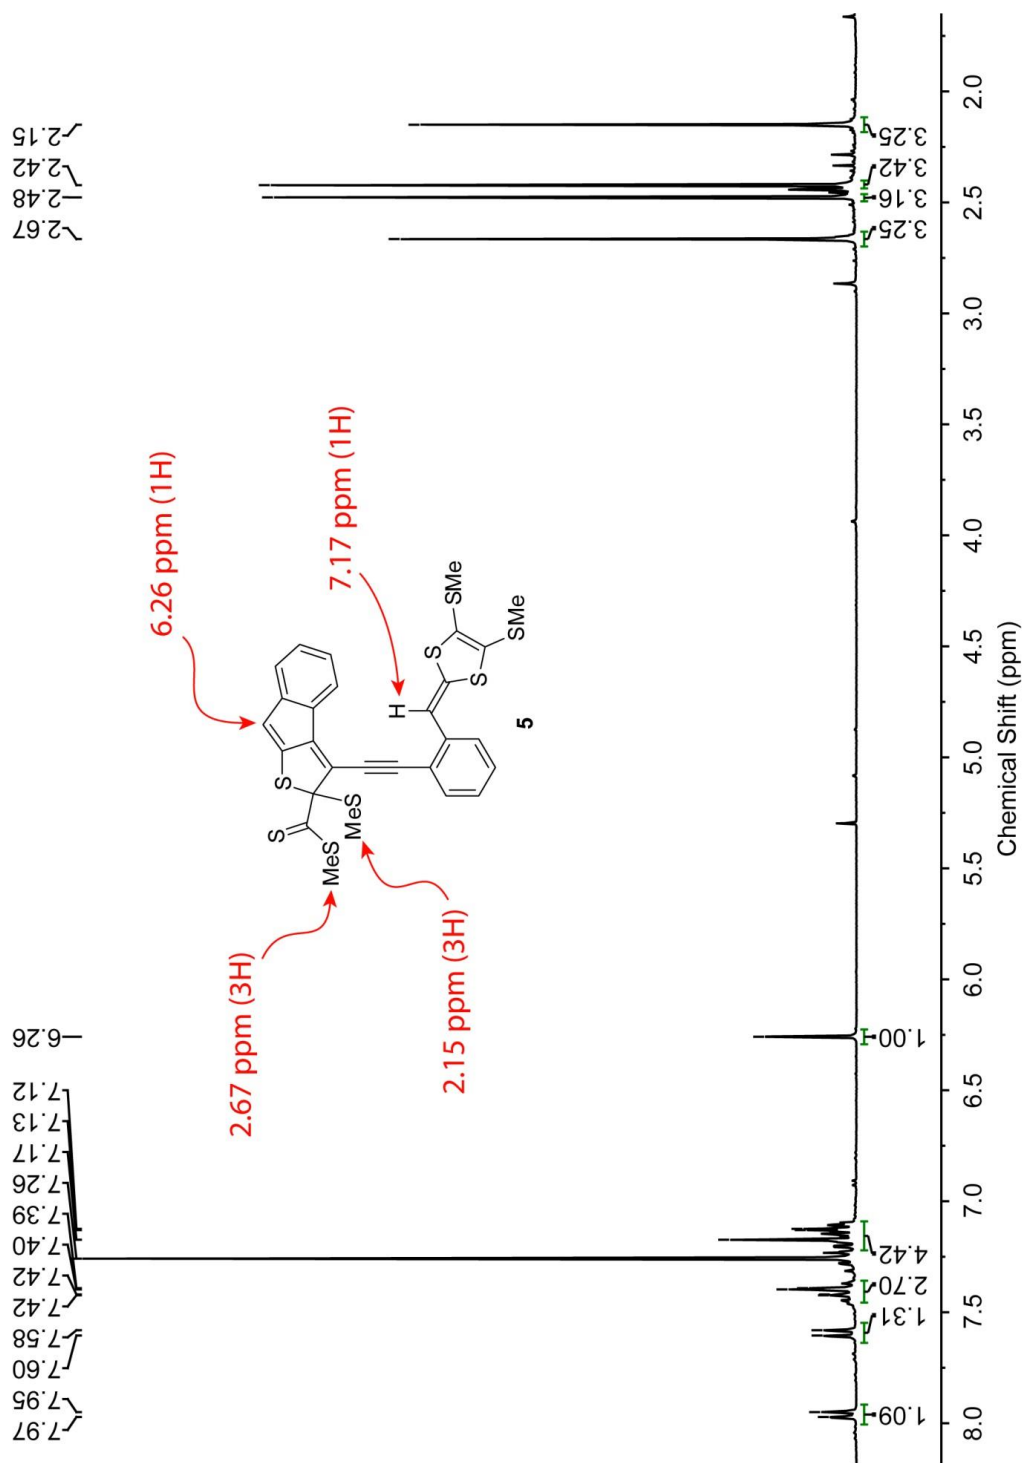Fig. S-1  $^1\text{H}$  NMR (300 MHz,  $\text{CDCl}_3$ ) spectrum of compound **5**.

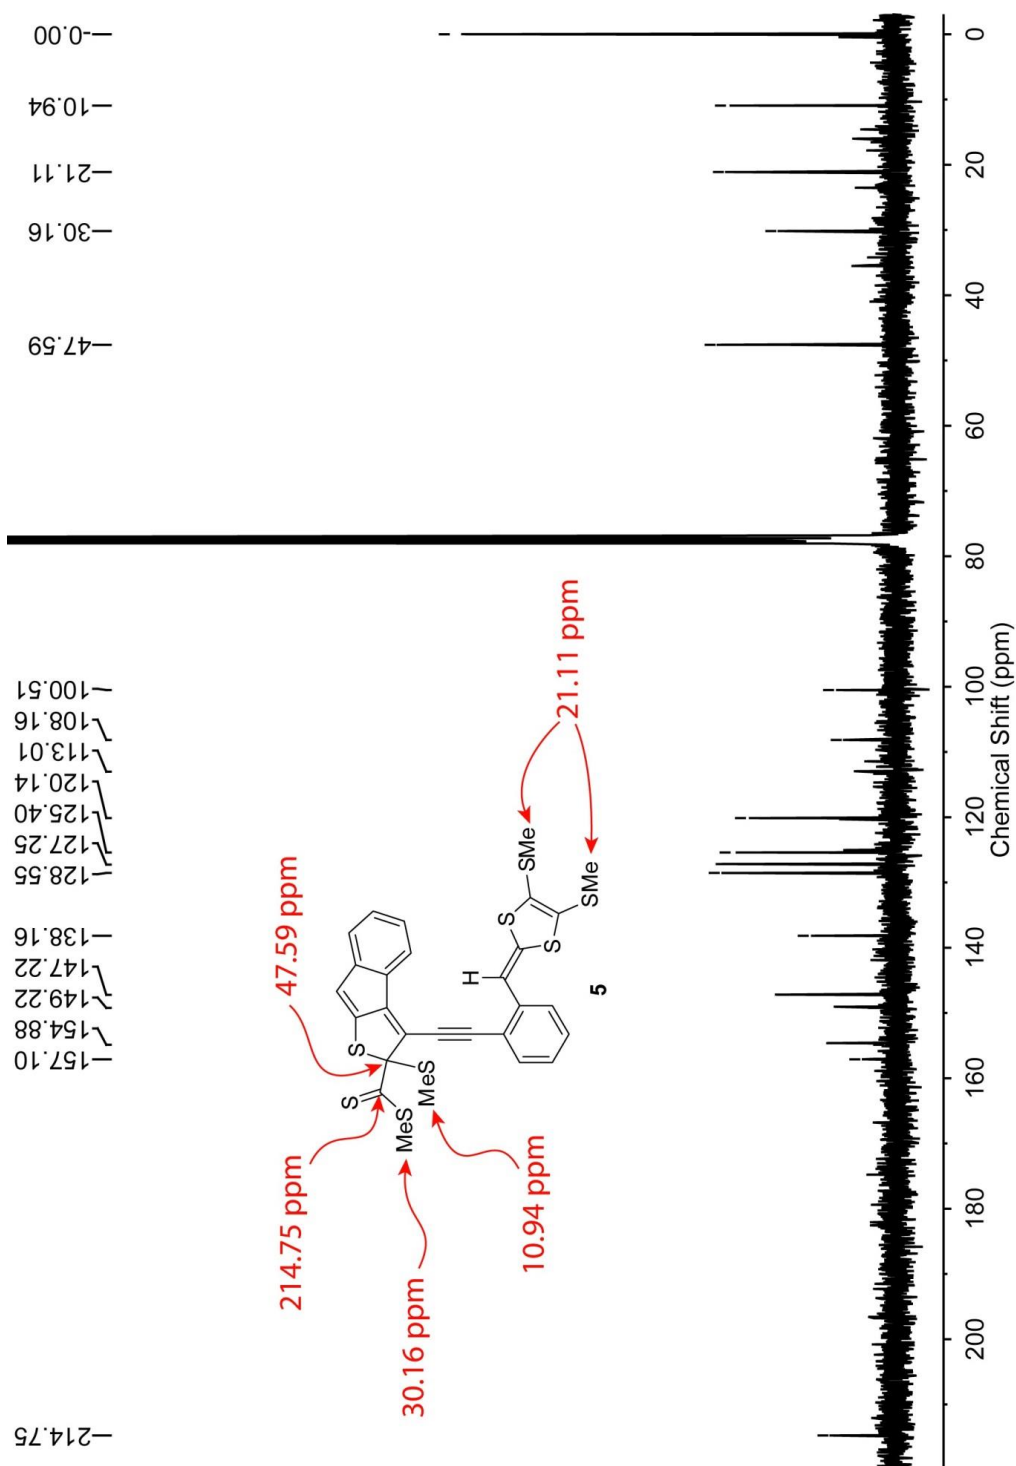

**Fig. S-2**  $^{13}\text{C}$  NMR (75 MHz,  $\text{CDCl}_3$ ) spectrum of compound 5.

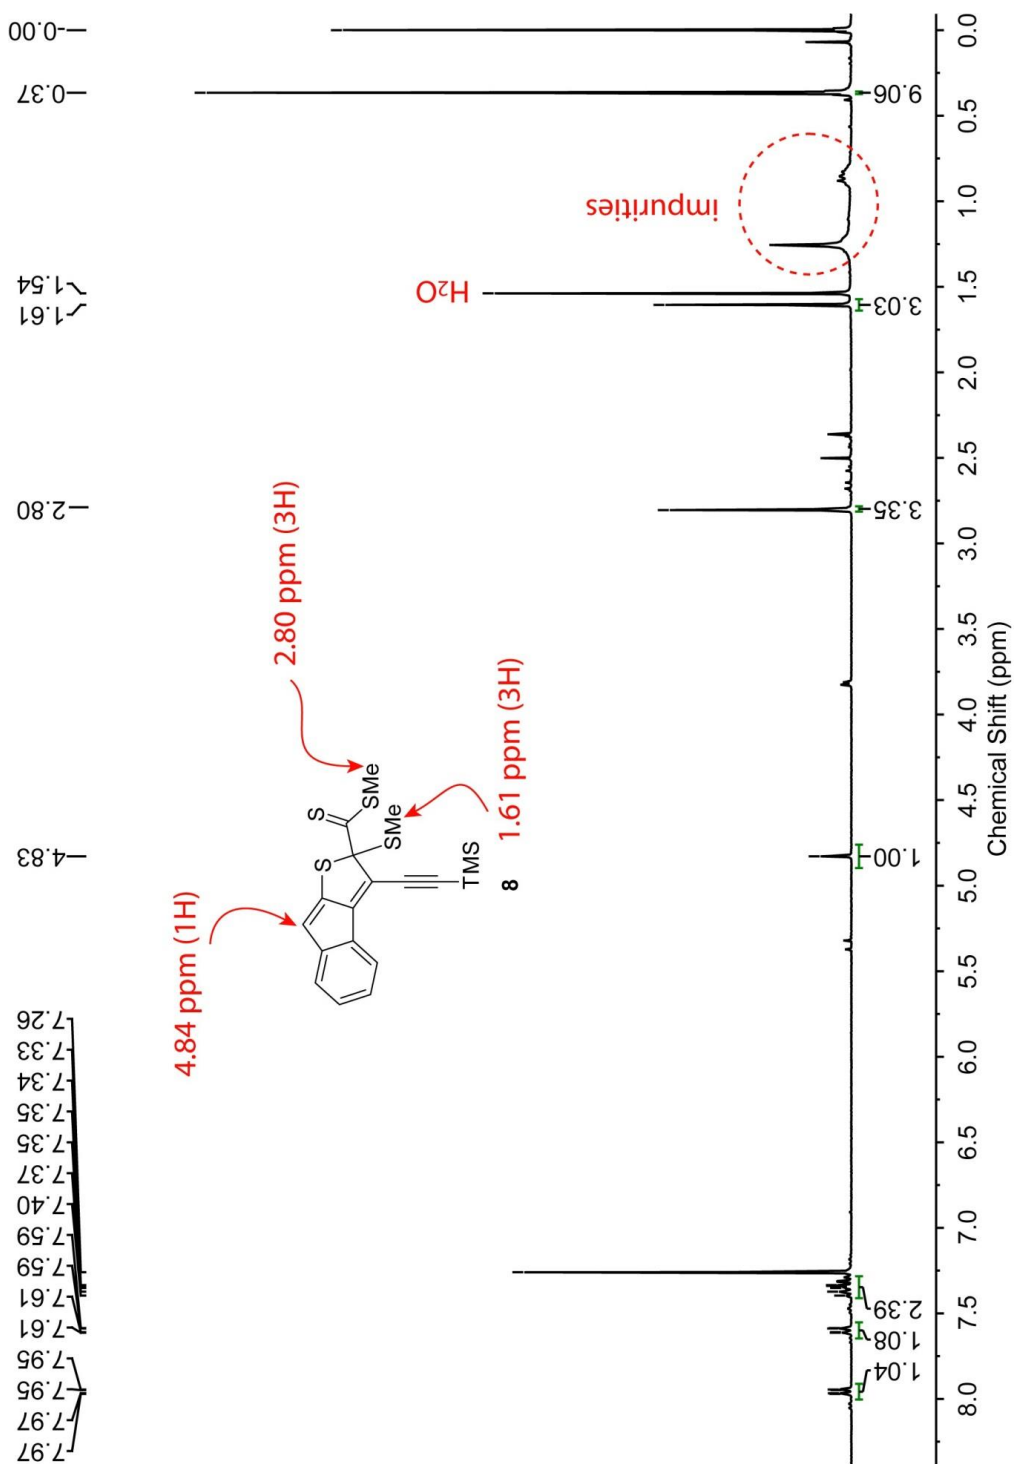

Fig. S-3  $^1\text{H}$  NMR (300 MHz,  $\text{CDCl}_3$ ) spectrum of compound **8**.

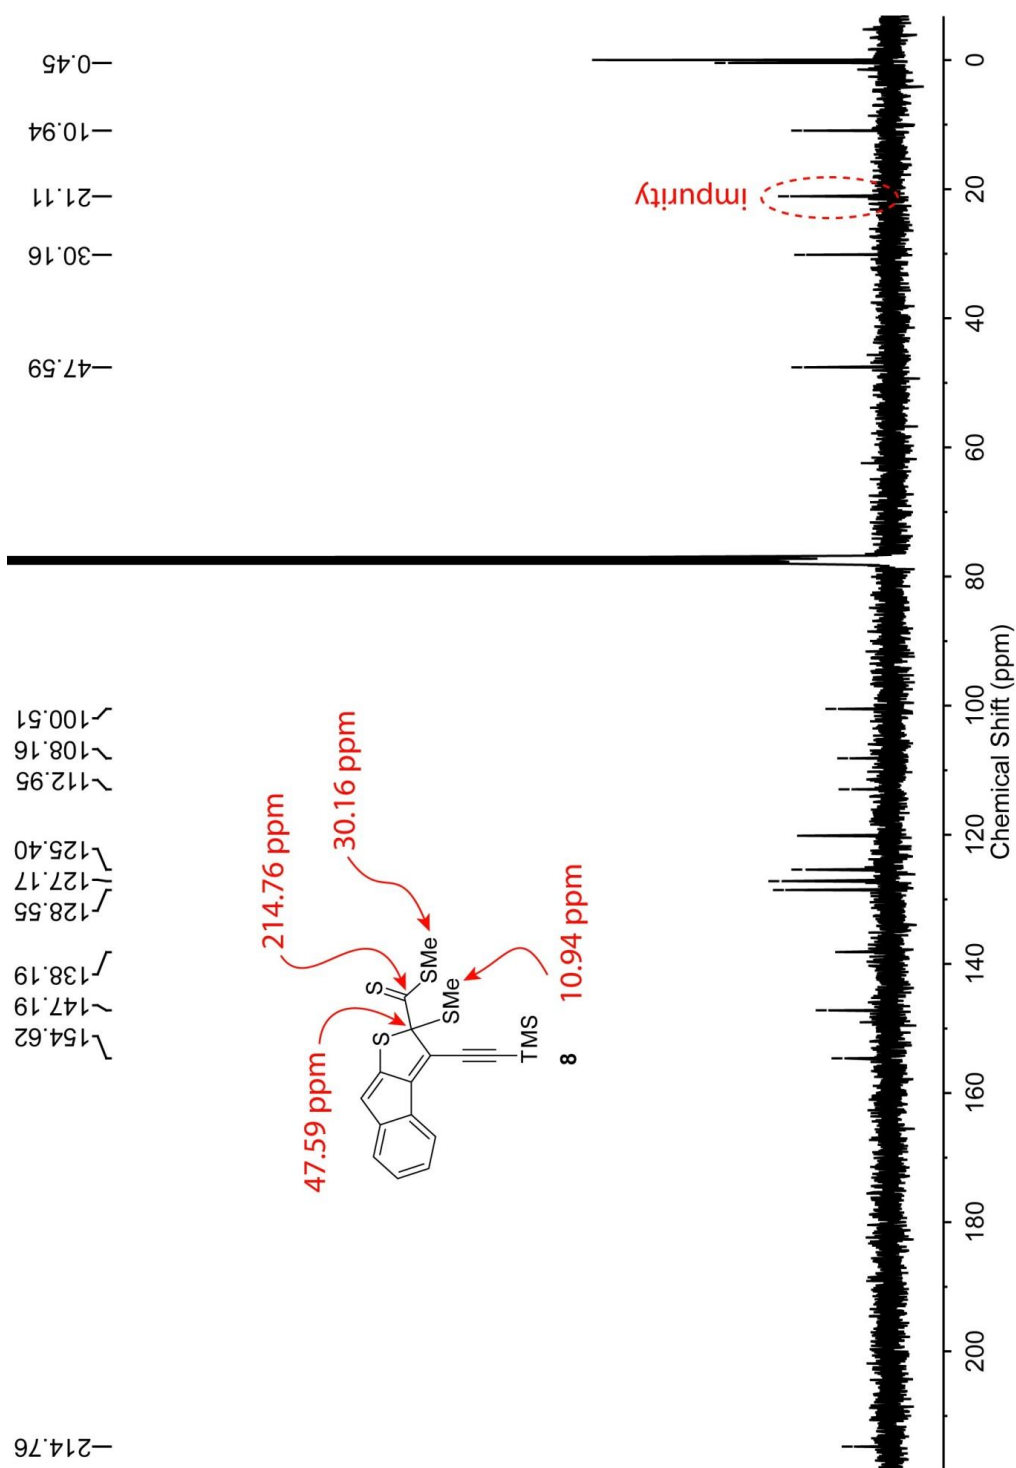

**Fig. S-4**  $^{13}\text{C}$  NMR (75 MHz,  $\text{CDCl}_3$ ) spectrum of compound **8**.

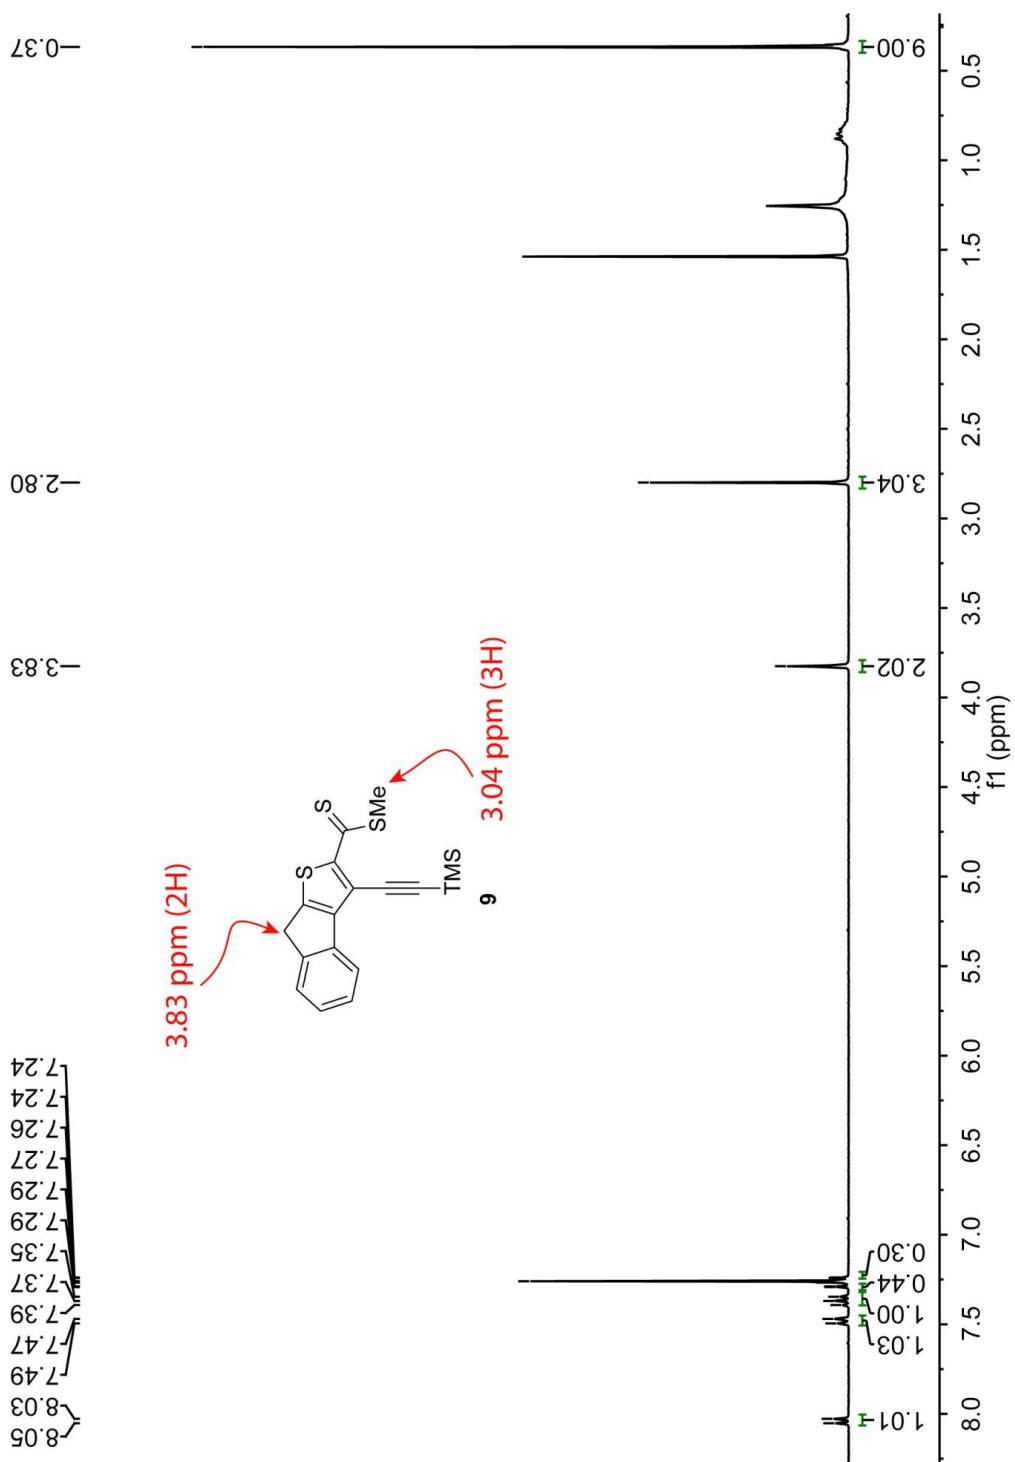

Fig. S-5  $^1\text{H}$  NMR (300 MHz,  $\text{CDCl}_3$ ) spectrum of compound **9**.

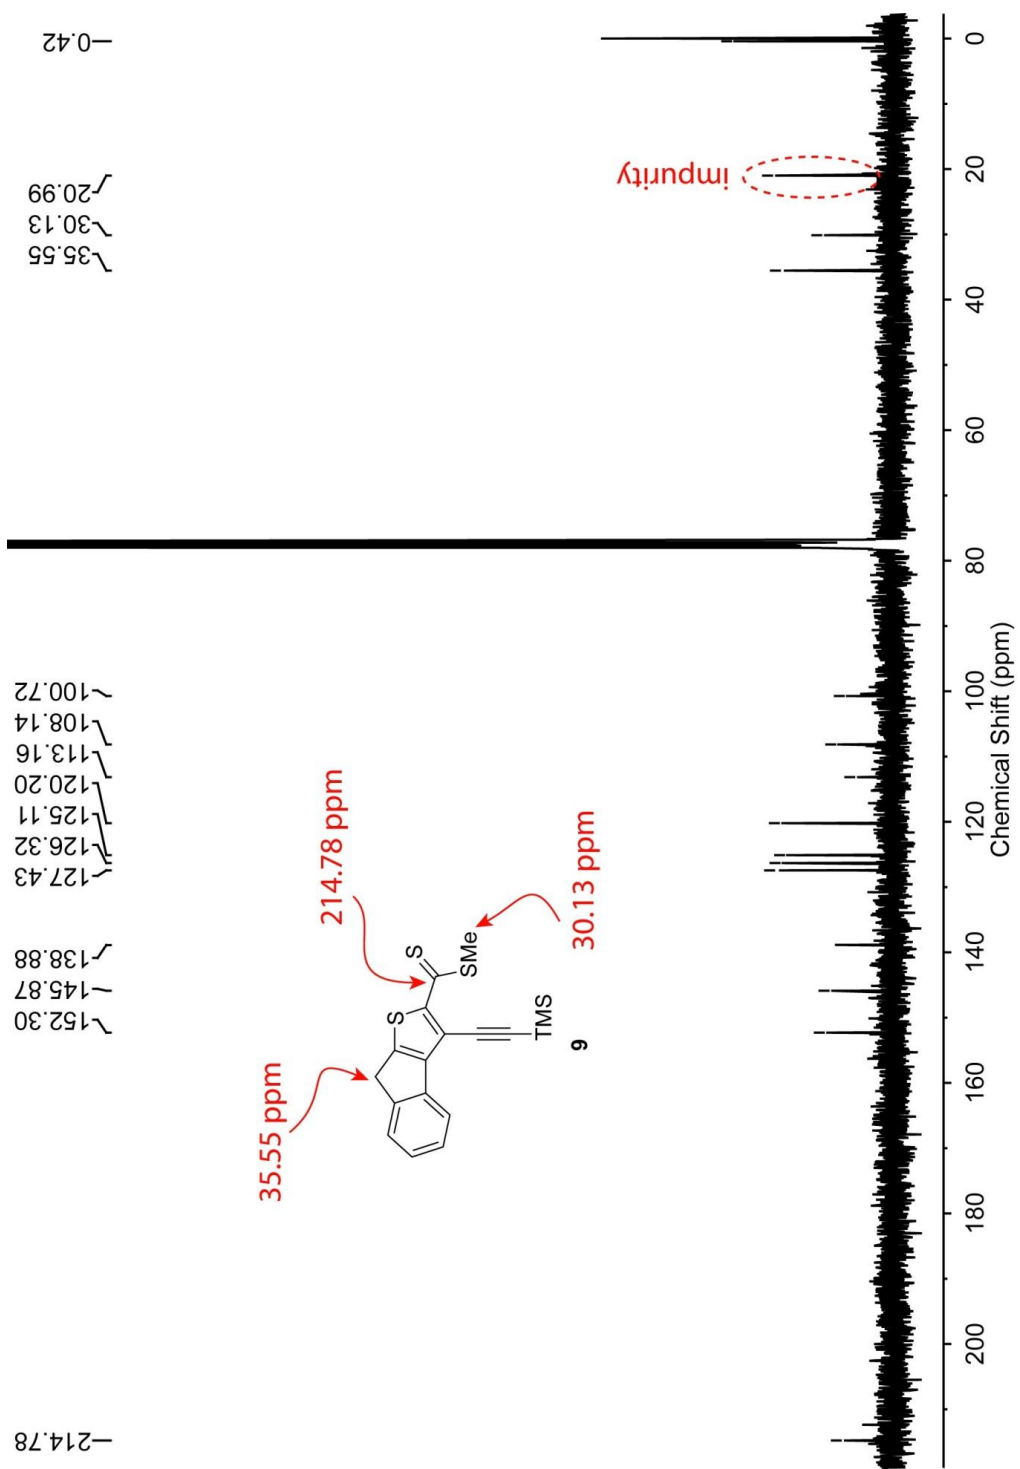

Fig. S-6  $^{13}\text{C}$  NMR (75 MHz,  $\text{CDCl}_3$ ) spectrum of compound 9.

## 2. Results of DFT Calculations

**Table S-1** Optimized geometries and energies for stationary points involved in the cycloaddition of compounds **10** and **11** (B3LYP/6-31+G(d), charge = +1, spin multiplicity = 1)

| <b>10</b>                                                   |             |             | <b>10-TS1</b>                                                                          |   |             |             |             |
|-------------------------------------------------------------|-------------|-------------|----------------------------------------------------------------------------------------|---|-------------|-------------|-------------|
| H                                                           | -1.78405500 | -2.17562000 | 1.49598200                                                                             | H | -3.03811800 | -2.38556300 | 0.00001000  |
| C                                                           | -2.12668000 | -1.35786000 | 0.86575500                                                                             | C | -2.87935000 | -1.31039700 | 0.00000300  |
| C                                                           | -3.04046800 | 0.74844500  | -0.72333200                                                                            | C | -2.49433900 | 1.48611000  | -0.00001000 |
| C                                                           | -1.33268900 | -0.21600300 | 0.72111700                                                                             | C | -1.58852600 | -0.78381000 | -0.00001100 |
| C                                                           | -3.36350400 | -1.45499300 | 0.22239400                                                                             | C | -3.97051600 | -0.43811300 | 0.00000800  |
| C                                                           | -3.81741000 | -0.39972600 | -0.57224300                                                                            | C | -3.77914100 | 0.95215000  | 0.00000400  |
| C                                                           | -1.79346400 | 0.85822400  | -0.08104900                                                                            | C | -1.39862800 | 0.60672000  | -0.00002100 |
| H                                                           | -3.96999400 | -2.34667600 | 0.34963100                                                                             | H | -4.97885100 | -0.84150700 | 0.00001600  |
| H                                                           | -4.78014600 | -0.46623300 | -1.07033300                                                                            | H | -4.63791200 | 1.61651500  | 0.00001100  |
| H                                                           | -3.39305500 | 1.57541100  | -1.33161400                                                                            | H | -2.33907000 | 2.56046200  | -0.00000900 |
| C                                                           | -0.00235400 | -0.11374700 | 1.44171300                                                                             | C | -0.31003800 | -1.59157100 | -0.00000900 |
| H                                                           | 0.07591200  | -0.91367400 | 2.19192500                                                                             | H | -0.24850400 | -2.24422200 | -0.87901200 |
| H                                                           | 0.07949500  | 0.83472200  | 1.98762900                                                                             | H | -0.24849000 | -2.24423300 | 0.87898300  |
| C                                                           | 1.19587700  | -0.23564100 | 0.53160900                                                                             | C | 0.85083700  | -0.58811900 | -0.00000900 |
| S                                                           | 2.73319400  | 0.34641100  | 0.96886500                                                                             | S | 1.87553400  | -0.52388800 | 1.46368200  |
| S                                                           | 1.11482400  | -1.01358300 | -0.97744800                                                                            | S | 1.87560000  | -0.52393000 | -1.46365100 |
| C                                                           | 3.55957400  | -0.19373500 | -0.45720300                                                                            | C | 2.98594700  | 0.55454800  | 0.68725100  |
| H                                                           | 4.62084400  | 0.01114500  | -0.55024600                                                                            | H | 3.70693400  | 1.09958000  | 1.28862200  |
| C                                                           | 2.79507000  | -0.83578600 | -1.37149600                                                                            | C | 2.98597600  | 0.55453100  | -0.68719900 |
| C                                                           | -1.01204000 | 2.04661900  | -0.23340400                                                                            | C | -0.00229900 | 1.02568300  | -0.00003800 |
| H                                                           | 3.14639100  | -1.22887500 | -2.31965200                                                                            | H | 3.70698900  | 1.09954800  | -1.28855200 |
| C                                                           | -0.35338200 | 3.05630500  | -0.36554200                                                                            | C | 0.73365200  | 2.05200700  | -0.00004800 |
| H                                                           | 0.18514800  | 3.97195300  | -0.48590800                                                                            | H | 1.25741800  | 2.98607400  | -0.00009000 |
| E(RB3LYP) = -1258.76053293 a.u.<br>Zero imaginary frequency |             |             | E(RB3LYP) = -1258.71570334 a.u.<br>One imaginary frequency (-286.95 cm <sup>-1</sup> ) |   |             |             |             |
| <b>10-IM1</b>                                               |             |             | <b>10-TS2</b>                                                                          |   |             |             |             |
| H                                                           | -3.22190000 | -2.26413900 | 0.00024300                                                                             | H | -3.16996900 | -2.29439800 | -0.02340100 |
| C                                                           | -2.91807000 | -1.22147300 | 0.00009400                                                                             | C | -2.90189900 | -1.24174900 | -0.01703500 |
| C                                                           | -2.21494100 | 1.55272600  | -0.00031800                                                                            | C | -2.27196900 | 1.53675700  | -0.01987000 |
| C                                                           | -1.57902300 | -0.85870700 | -0.00002000                                                                            | C | -1.57414600 | -0.83774900 | -0.08576000 |
| C                                                           | -3.88297200 | -0.20515600 | 0.00005200                                                                             | C | -3.89799900 | -0.26116500 | 0.05834600  |
| C                                                           | -3.54097500 | 1.16825900  | -0.00011500                                                                            | C | -3.58858200 | 1.11636400  | 0.05656000  |
| C                                                           | -1.22431900 | 0.53305900  | -0.00028700                                                                            | C | -1.25482300 | 0.55427400  | -0.08052000 |
| H                                                           | -4.93460200 | -0.47979500 | 0.00018000                                                                             | H | -4.93897100 | -0.56699400 | 0.11627600  |
| H                                                           | -4.32947400 | 1.91392400  | -0.00001700                                                                            | H | -4.39142600 | 1.84462900  | 0.11377000  |
| H                                                           | -1.93140300 | 2.60086100  | -0.00036700                                                                            | H | -2.02221100 | 2.59354900  | -0.02482200 |
| C                                                           | -0.35300800 | -1.74631800 | -0.00017300                                                                            | C | -0.33791300 | -1.70731900 | -0.22619200 |
| H                                                           | -0.32992700 | -2.39985800 | -0.88031400                                                                            | H | -0.32041900 | -2.20830600 | -1.20281100 |
| H                                                           | -0.32972500 | -2.40005400 | 0.87980200                                                                             | H | -0.28220900 | -2.49303200 | 0.53441300  |
| C                                                           | 0.80200900  | -0.73748000 | -0.00024100                                                                            | C | 0.14900400  | 0.70889300  | -0.16433700 |
| S                                                           | 1.88910700  | -0.60187800 | 1.49484100                                                                             | C | 0.80081700  | -0.68876600 | -0.11632200 |
| S                                                           | 1.88993300  | -0.60225100 | -1.49436100                                                                            | S | 2.10724900  | -0.55453500 | -1.39655800 |
| C                                                           | 2.39418600  | 0.98528000  | 0.74544900                                                                             | S | 1.71183100  | -0.63229400 | 1.54858300  |
| H                                                           | 3.07720900  | 1.61086700  | 1.31095200                                                                             | C | 2.45653400  | 0.80201200  | 0.93848300  |
| C                                                           | 2.39457200  | 0.98510700  | -0.74512800                                                                            | H | 2.99551500  | 1.46288000  | 1.61301400  |
| C                                                           | 0.16626100  | 0.63043100  | -0.00018900                                                                            | C | 2.44804500  | 1.02733400  | -0.52423200 |
| H                                                           | 3.07802500  | 1.61045300  | -1.31039300                                                                            | H | 3.24039200  | 1.64308500  | -0.94400800 |
| C                                                           | 1.19646700  | 1.64162800  | -0.00033200                                                                            | C | 1.10664300  | 1.69738000  | -0.22822800 |
| H                                                           | 1.01603400  | 2.70964900  | -0.00051600                                                                            | H | 0.98175600  | 2.77026100  | -0.16018300 |



|                                                             |             |             |             |                                                                                        |             |             |             |
|-------------------------------------------------------------|-------------|-------------|-------------|----------------------------------------------------------------------------------------|-------------|-------------|-------------|
| E(RB3LYP) = -1258.77575296 a.u.<br>Zero imaginary frequency |             |             |             | E(RB3LYP) = -1258.76614232 a.u.<br>One imaginary frequency (-300.68 cm <sup>-1</sup> ) |             |             |             |
| <b>10-IM2</b>                                               |             |             |             | <b>10-TS3</b>                                                                          |             |             |             |
| H                                                           | -3.14932700 | -2.31241100 | -0.09272600 | H                                                                                      | 3.16651700  | -2.31104100 | 0.03138200  |
| C                                                           | -2.90652000 | -1.25413400 | -0.05143400 | C                                                                                      | 2.91940900  | -1.25301900 | 0.01662300  |
| C                                                           | -2.32109700 | 1.52417200  | 0.04434400  | C                                                                                      | 2.31924600  | 1.52251300  | -0.02350800 |
| C                                                           | -1.59179900 | -0.81399700 | -0.16889800 | C                                                                                      | 1.60832900  | -0.82385100 | -0.16257500 |
| C                                                           | -3.91964400 | -0.30390600 | 0.11456300  | C                                                                                      | 3.92418300  | -0.29140300 | 0.17147600  |
| C                                                           | -3.63034700 | 1.07305300  | 0.15986700  | C                                                                                      | 3.62779100  | 1.08310700  | 0.14965300  |
| C                                                           | -1.29562600 | 0.57410400  | -0.11230800 | C                                                                                      | 1.30560300  | 0.56240000  | -0.17679500 |
| H                                                           | -4.95022600 | -0.63402400 | 0.20834500  | H                                                                                      | 4.95253800  | -0.61219900 | 0.31062400  |
| H                                                           | -4.43894700 | 1.78598500  | 0.28899600  | H                                                                                      | 4.42863300  | 1.80589800  | 0.27237400  |
| H                                                           | -2.09468700 | 2.58574500  | 0.08158200  | H                                                                                      | 2.08872300  | 2.58387100  | -0.03714000 |
| C                                                           | -0.34553000 | -1.65021600 | -0.41472400 | C                                                                                      | 0.36737700  | -1.67399500 | -0.39510200 |
| H                                                           | -0.32940200 | -2.04318800 | -1.44086400 | H                                                                                      | 0.24535900  | -2.48995700 | 0.32416900  |
| H                                                           | -0.25454600 | -2.51279800 | 0.25329700  | H                                                                                      | 0.37819400  | -2.13550100 | -1.39333300 |
| C                                                           | 0.12718100  | 0.76046700  | -0.24226000 | C                                                                                      | -0.73881700 | -0.63754200 | -0.33697600 |
| C                                                           | 0.77235500  | -0.62371500 | -0.24607200 | S                                                                                      | -2.22861900 | -0.58398100 | -1.30366900 |
| S                                                           | 2.20329400  | -0.46883500 | -1.35539000 | S                                                                                      | -1.66238000 | -0.53260200 | 1.68143500  |
| S                                                           | 1.64742400  | -0.67955900 | 1.55585900  | C                                                                                      | -0.12007900 | 0.72836300  | -0.35552800 |
| C                                                           | 2.62401900  | 0.55513300  | 1.04836100  | C                                                                                      | -2.43302100 | 1.04893300  | -0.44105300 |
| H                                                           | 3.34903000  | 0.99340500  | 1.73319800  | H                                                                                      | -3.26939700 | 1.63723500  | -0.81699200 |
| C                                                           | 2.43740200  | 1.08786200  | -0.36594500 | C                                                                                      | -2.62167400 | 0.62154800  | 1.03221300  |
| H                                                           | 3.26581700  | 1.70776700  | -0.70675300 | H                                                                                      | -3.37147800 | 1.12562500  | 1.64158000  |
| C                                                           | 1.05984700  | 1.73678900  | -0.31285600 | C                                                                                      | -1.06328400 | 1.69479100  | -0.46721600 |
| H                                                           | 0.92936100  | 2.81016500  | -0.24840600 | H                                                                                      | -0.93347900 | 2.77033600  | -0.44419700 |
| E(RB3LYP) = -1258.77021841 a.u.<br>Zero imaginary frequency |             |             |             | E(RB3LYP) = -1258.76965218 a.u.<br>One imaginary frequency (-167.83 cm <sup>-1</sup> ) |             |             |             |
| <b>10-IM3</b>                                               |             |             |             | <b>10-TS4</b>                                                                          |             |             |             |
| H                                                           | 3.59656400  | -2.15339000 | 0.38991200  | H                                                                                      | 3.37420900  | -2.26407500 | 0.26330200  |
| C                                                           | 3.22788900  | -1.13959300 | 0.26067900  | C                                                                                      | 3.06920100  | -1.22759100 | 0.14824800  |
| C                                                           | 2.31794300  | 1.54002600  | -0.06456800 | C                                                                                      | 2.32527500  | 1.50774400  | -0.13119400 |
| C                                                           | 1.88797800  | -0.88748100 | 0.00209700  | C                                                                                      | 1.74471100  | -0.88639600 | -0.06266900 |
| C                                                           | 4.10513600  | -0.05040400 | 0.36108400  | C                                                                                      | 4.02454100  | -0.19798500 | 0.21239500  |
| C                                                           | 3.65680900  | 1.27337400  | 0.20253100  | C                                                                                      | 3.65536100  | 1.15156300  | 0.07484200  |
| C                                                           | 1.43378600  | 0.45266400  | -0.16629200 | C                                                                                      | 1.36586900  | 0.48314300  | -0.20236400 |
| H                                                           | 5.15571900  | -0.23277900 | 0.56831600  | H                                                                                      | 5.06833400  | -0.45068700 | 0.37410800  |
| H                                                           | 4.36488500  | 2.09175200  | 0.28891500  | H                                                                                      | 4.41779500  | 1.92245700  | 0.13117500  |
| H                                                           | 1.96995500  | 2.56141200  | -0.18985300 | H                                                                                      | 2.04122500  | 2.55065500  | -0.23793100 |
| C                                                           | 0.73453200  | -1.86873400 | -0.14139700 | C                                                                                      | 0.52085500  | -1.79132700 | -0.16779400 |
| H                                                           | 0.55549500  | -2.42210400 | 0.79061900  | H                                                                                      | 0.38437100  | -2.41310400 | 0.72561400  |
| H                                                           | 0.90933900  | -2.61205500 | -0.92996300 | H                                                                                      | 0.57438700  | -2.46913300 | -1.03085800 |
| C                                                           | -0.38714000 | -0.92176200 | -0.47606300 | C                                                                                      | -0.54914900 | -0.75375000 | -0.34293300 |
| S                                                           | -2.09980900 | -1.06812200 | -0.53052800 | S                                                                                      | -2.32936300 | -0.89757000 | -0.87068100 |
| S                                                           | -2.74822600 | 0.04931400  | 1.39056700  | S                                                                                      | -2.10177200 | -0.26865100 | 1.49803800  |
| C                                                           | 0.02226300  | 0.39960000  | -0.43691400 | C                                                                                      | -0.06096000 | 0.52756300  | -0.40659600 |
| C                                                           | -2.31496100 | 0.70224500  | -1.11334400 | C                                                                                      | -2.46164300 | 0.94422300  | -0.81984600 |
| H                                                           | -2.84692200 | 0.88320400  | -2.04422800 | H                                                                                      | -3.18033300 | 1.40386600  | -1.48978200 |
| C                                                           | -2.38107200 | 1.36804200  | 0.21276400  | C                                                                                      | -2.22286000 | 1.30486200  | 0.60777400  |
| H                                                           | -2.84043100 | 2.33664000  | 0.38889300  | H                                                                                      | -2.72032600 | 2.12235300  | 1.12035900  |
| C                                                           | -1.04948300 | 1.38077900  | -0.63502000 | C                                                                                      | -1.10399300 | 1.55072600  | -0.43900200 |
| H                                                           | -0.81813500 | 2.35569500  | -1.05657300 | H                                                                                      | -0.90474400 | 2.58054500  | -0.71885800 |
| E(RB3LYP) = -1258.75032319 a.u.<br>Zero imaginary frequency |             |             |             | E(RB3LYP) = -1258.69173135 a.u.<br>One imaginary frequency (-575.23 cm <sup>-1</sup> ) |             |             |             |

| <b>10-TS5</b>                                                                          |             |             |             | <b>10-P</b>                                                                            |             |             |             |
|----------------------------------------------------------------------------------------|-------------|-------------|-------------|----------------------------------------------------------------------------------------|-------------|-------------|-------------|
| H                                                                                      | -3.62074900 | 2.10639300  | 0.54535500  | H                                                                                      | 3.96432000  | 2.01405400  | 0.56773900  |
| C                                                                                      | -3.24926700 | 1.10315600  | 0.35626300  | C                                                                                      | 3.57830800  | 1.01319700  | 0.39476600  |
| C                                                                                      | -2.33231300 | -1.54955700 | -0.12438600 | C                                                                                      | 2.60650500  | -1.61539900 | -0.05270500 |
| C                                                                                      | -1.91559000 | 0.87442200  | 0.04931800  | C                                                                                      | 2.23161100  | 0.79641400  | 0.12897300  |
| C                                                                                      | -4.11688700 | 0.00382900  | 0.42541500  | C                                                                                      | 4.43749000  | -0.09251400 | 0.43449900  |
| C                                                                                      | -3.66470600 | -1.30780800 | 0.18974800  | C                                                                                      | 3.95768900  | -1.39183400 | 0.21355400  |
| C                                                                                      | -1.45690000 | -0.45125400 | -0.19578800 | C                                                                                      | 1.74766600  | -0.51229800 | -0.09191900 |
| H                                                                                      | -5.16285700 | 0.16802500  | 0.66821400  | H                                                                                      | 5.49298000  | 0.05984800  | 0.63982400  |
| H                                                                                      | -4.36494500 | -2.13481900 | 0.25434000  | H                                                                                      | 4.64477700  | -2.23163500 | 0.25052300  |
| H                                                                                      | -1.98015600 | -2.56048100 | -0.30828500 | H                                                                                      | 2.23794400  | -2.62319600 | -0.22223800 |
| C                                                                                      | -0.77731600 | 1.87715600  | -0.07429600 | C                                                                                      | 1.11032900  | 1.82555900  | 0.03059300  |
| H                                                                                      | -0.58788100 | 2.40420700  | 0.87052400  | H                                                                                      | 1.25859800  | 2.55765600  | -0.77693200 |
| H                                                                                      | -0.97005000 | 2.64412700  | -0.83605300 | H                                                                                      | 0.96516600  | 2.41011100  | 0.95049500  |
| C                                                                                      | 0.35579000  | 0.96603900  | -0.46255800 | C                                                                                      | -0.07545600 | 0.95753700  | -0.25110200 |
| S                                                                                      | 2.03088100  | 1.15221500  | -0.53637600 | S                                                                                      | -4.26714700 | -0.25629700 | 0.90466200  |
| S                                                                                      | 2.89187600  | -0.20248800 | 1.43809600  | S                                                                                      | -1.70265200 | 1.28684500  | -0.46078000 |
| C                                                                                      | -0.05207700 | -0.38400600 | -0.49698800 | C                                                                                      | -2.05071700 | -0.51087700 | -0.80136600 |
| C                                                                                      | 2.28439400  | -0.60520300 | -1.13618500 | C                                                                                      | 0.30842800  | -0.42958200 | -0.33742100 |
| H                                                                                      | 2.79588400  | -0.72404900 | -2.09290700 | C                                                                                      | -0.75126700 | -1.23813900 | -0.62451800 |
| C                                                                                      | 2.50840200  | -1.29899800 | 0.14049500  | H                                                                                      | -0.71370900 | -2.31680300 | -0.74503900 |
| H                                                                                      | 2.80602400  | -2.34144900 | 0.22007900  | C                                                                                      | -3.21528700 | -1.07841700 | -0.00409600 |
| C                                                                                      | 1.00000000  | -1.30332400 | -0.77121400 | H                                                                                      | -2.33785800 | -0.53848200 | -1.87020200 |
| H                                                                                      | 0.81943000  | -2.30431600 | -1.14772700 | H                                                                                      | -3.30721500 | -2.16219400 | -0.13183900 |
| E(RB3LYP) = -1258.74672585 a.u.<br>One imaginary frequency (-433.79 cm <sup>-1</sup> ) |             |             |             | E(RB3LYP) = -1258.79366799 a.u.<br>Zero imaginary frequency                            |             |             |             |
| <b>11</b>                                                                              |             |             |             | <b>11-TS1</b>                                                                          |             |             |             |
| H                                                                                      | 2.66763100  | -2.16480500 | -1.26387900 | H                                                                                      | -3.32073100 | -2.28384100 | -0.00049400 |
| C                                                                                      | 2.72383700  | -1.22513400 | -0.71899900 | C                                                                                      | -3.17009900 | -1.20633500 | -0.00028000 |
| C                                                                                      | 2.90250100  | 1.20113600  | 0.65649300  | C                                                                                      | -2.81453600 | 1.54696400  | 0.00030300  |
| C                                                                                      | 1.61696200  | -0.37339000 | -0.69209300 | C                                                                                      | -1.86505800 | -0.69658700 | -0.00027700 |
| C                                                                                      | 3.90991000  | -0.87683600 | -0.06546800 | C                                                                                      | -4.28033000 | -0.36471000 | -0.00002400 |
| C                                                                                      | 3.99582800  | 0.33690000  | 0.62084100  | C                                                                                      | -4.09955700 | 1.02193900  | 0.00027400  |
| C                                                                                      | 1.70157500  | 0.86201000  | 0.00287300  | C                                                                                      | -1.67532400 | 0.70405000  | 0.00001600  |
| H                                                                                      | 4.76227400  | -1.54867000 | -0.10031100 | H                                                                                      | -5.27936800 | -0.79031700 | -0.00004600 |
| H                                                                                      | 4.91645400  | 0.61455700  | 1.12552600  | H                                                                                      | -4.95612800 | 1.68922500  | 0.00048200  |
| H                                                                                      | 2.96591200  | 2.14878900  | 1.18196700  | H                                                                                      | -2.65961900 | 2.62109700  | 0.00052300  |
| C                                                                                      | 0.34435800  | -0.74231100 | -1.43142200 | C                                                                                      | -0.76201300 | -1.76908400 | -0.00070600 |
| H                                                                                      | 0.51582100  | -1.64711800 | -2.03193900 | H                                                                                      | -0.91376400 | -2.41324200 | -0.87578200 |
| H                                                                                      | 0.05369300  | 0.04798700  | -2.13507900 | H                                                                                      | -0.91403500 | -2.41419200 | 0.87362100  |
| C                                                                                      | -0.83121600 | -1.02141600 | -0.52630600 | C                                                                                      | 0.68264800  | -1.35030900 | -0.00022400 |
| C                                                                                      | 0.58820900  | 1.74825500  | 0.03742600  | C                                                                                      | -0.40427100 | 1.35208400  | 0.00000100  |
| C                                                                                      | -0.36797100 | 2.50843100  | 0.06939700  | C                                                                                      | 0.58022900  | 2.07747400  | -0.00004400 |
| S                                                                                      | -2.43859700 | -0.76986500 | -1.01941100 | S                                                                                      | 1.57326300  | -1.15746900 | 1.43478500  |
| S                                                                                      | -0.64193200 | -1.67633600 | 1.03200500  | S                                                                                      | 1.57410800  | -1.15719300 | -1.43466100 |
| C                                                                                      | -3.18289400 | -1.36616800 | 0.42895500  | C                                                                                      | 3.07846700  | -0.76211100 | 0.67819000  |
| H                                                                                      | -4.26554500 | -1.35743300 | 0.49665500  | H                                                                                      | 3.93329800  | -0.54091300 | 1.30808700  |
| C                                                                                      | -2.33464100 | -1.79432300 | 1.39321100  | C                                                                                      | 3.07886600  | -0.76198300 | -0.67711000 |
| H                                                                                      | -2.62890300 | -2.18504000 | 2.36150800  | H                                                                                      | 3.93406900  | -0.54067100 | -1.30646100 |
| C                                                                                      | -1.43432700 | 3.35969000  | 0.10044000  | C                                                                                      | 1.69192000  | 2.86912500  | -0.00014000 |
| H                                                                                      | -3.19934700 | 4.80883100  | 0.15083900  | H                                                                                      | 3.52001300  | 4.23957300  | -0.00034200 |
| C                                                                                      | -2.38205000 | 4.12017600  | 0.12685300  | C                                                                                      | 2.67544500  | 3.58412800  | -0.00023900 |
| E(RB3LYP) = -1334.92095557 a.u.<br>Zero imaginary frequency                            |             |             |             | E(RB3LYP) = -1334.89024157 a.u.<br>One imaginary frequency (-243.00 cm <sup>-1</sup> ) |             |             |             |

| <b>11-IM1</b>                                               |             |             |             | <b>11-TS2</b>                                                                          |             |             |             |
|-------------------------------------------------------------|-------------|-------------|-------------|----------------------------------------------------------------------------------------|-------------|-------------|-------------|
| H                                                           | -3.61345600 | -2.20191300 | -0.00001900 | H                                                                                      | -3.65911700 | -2.13208600 | -0.00014100 |
| C                                                           | -3.26611700 | -1.17222000 | -0.00001900 | C                                                                                      | -3.26474300 | -1.11950000 | -0.00011500 |
| C                                                           | -2.39215700 | 1.51995300  | -0.00000800 | C                                                                                      | -2.27307000 | 1.53544400  | -0.00003300 |
| C                                                           | -1.90386200 | -0.88017800 | -0.00002800 | C                                                                                      | -1.89216000 | -0.88784000 | -0.00038800 |
| C                                                           | -4.18360100 | -0.11791500 | -0.00000200 | C                                                                                      | -4.13381500 | -0.02384300 | 0.00017300  |
| C                                                           | -3.74997400 | 1.21854400  | 0.00000500  | C                                                                                      | -3.64230300 | 1.29306300  | 0.00020000  |
| C                                                           | -1.47371400 | 0.45731900  | -0.00002300 | C                                                                                      | -1.40010800 | 0.43411600  | -0.00032600 |
| H                                                           | -5.24778900 | -0.33489200 | 0.00000700  | H                                                                                      | -5.20669300 | -0.19301900 | 0.00038300  |
| H                                                           | -4.47993700 | 2.02228300  | 0.00002000  | H                                                                                      | -4.33787300 | 2.12671500  | 0.00043200  |
| H                                                           | -2.05354600 | 2.55170900  | -0.00000300 | H                                                                                      | -1.88869100 | 2.55099800  | 0.00003700  |
| C                                                           | -0.75766700 | -1.85917000 | 0.00000100  | C                                                                                      | -0.78399300 | -1.91989700 | -0.00092000 |
| H                                                           | -0.77981800 | -2.51502900 | -0.87770200 | H                                                                                      | -0.83178600 | -2.57281700 | -0.88014900 |
| H                                                           | -0.77981900 | -2.51497600 | 0.87774200  | H                                                                                      | -0.83193200 | -2.57424600 | 0.87722300  |
| C                                                           | 0.52577100  | -0.98946900 | -0.00000400 | C                                                                                      | 0.50754900  | -1.07917500 | -0.00026900 |
| S                                                           | 1.57712400  | -1.19301400 | 1.47452100  | S                                                                                      | 1.59261400  | -1.24578000 | -1.47504300 |
| S                                                           | 1.57722600  | -1.19321200 | -1.47442800 | S                                                                                      | 1.59110900  | -1.24544600 | 1.47566200  |
| C                                                           | 2.91639900  | -0.41178100 | 0.68330200  | C                                                                                      | 2.72558400  | -0.18381700 | -0.69205600 |
| H                                                           | 3.73958100  | -0.04028100 | 1.28528500  | H                                                                                      | 3.47522500  | 0.33639400  | -1.28070400 |
| C                                                           | 2.91645600  | -0.41189800 | -0.68323700 | C                                                                                      | 0.05216700  | 0.43838300  | -0.00039200 |
| C                                                           | -0.01404400 | 0.54829300  | -0.00004400 | C                                                                                      | 2.72479800  | -0.18351300 | 0.69349300  |
| H                                                           | 3.73968200  | -0.04049600 | -1.28521900 | H                                                                                      | 3.47385100  | 0.33685000  | 1.28275100  |
| C                                                           | 0.76614100  | 1.58422400  | -0.00006300 | C                                                                                      | 0.94911300  | 1.40035800  | -0.00018100 |
| C                                                           | 1.40924500  | 2.74765100  | -0.00006900 | C                                                                                      | 1.39949000  | 2.66821700  | -0.00030400 |
| H                                                           | 2.44406300  | 4.80136900  | -0.00005600 | C                                                                                      | 1.81572600  | 3.81938100  | -0.00041700 |
| C                                                           | 1.96736100  | 3.84195300  | -0.00006800 | H                                                                                      | 2.16204500  | 4.83257900  | -0.00053100 |
| E(RB3LYP) = -1334.89083741 a.u.<br>Zero imaginary frequency |             |             |             | E(RB3LYP) = -1334.89105285 a.u.<br>One imaginary frequency (-104.18 cm <sup>-1</sup> ) |             |             |             |
| <b>11-IM2</b>                                               |             |             |             | <b>11-TS3</b>                                                                          |             |             |             |
| H                                                           | -3.64090400 | -2.14759900 | 0.00011600  | H                                                                                      | -3.61413100 | -2.16959300 | -0.05852500 |
| C                                                           | -3.19422000 | -1.15770200 | 0.00002000  | C                                                                                      | -3.18946300 | -1.17014300 | -0.03534400 |
| C                                                           | -2.11161300 | 1.49448800  | -0.00017600 | C                                                                                      | -2.15187000 | 1.48957600  | 0.01081600  |
| C                                                           | -1.81865000 | -0.98517600 | -0.00019100 | C                                                                                      | -1.81690400 | -0.97013900 | -0.07974100 |
| C                                                           | -4.00796200 | -0.01567500 | 0.00007400  | C                                                                                      | -4.02680000 | -0.04917400 | 0.03941500  |
| C                                                           | -3.47820000 | 1.29631600  | -0.00003000 | C                                                                                      | -3.51636100 | 1.26765300  | 0.06173100  |
| C                                                           | -1.27363900 | 0.34497200  | -0.00025700 | C                                                                                      | -1.29321200 | 0.36225700  | -0.05220200 |
| H                                                           | -5.08760100 | -0.14137300 | 0.00020300  | H                                                                                      | -5.10275200 | -0.19598800 | 0.07892900  |
| H                                                           | -4.15573000 | 2.14412700  | 0.00002400  | H                                                                                      | -4.20408100 | 2.10547000  | 0.11860500  |
| H                                                           | -1.67821900 | 2.48918800  | -0.00022400 | H                                                                                      | -1.74039500 | 2.49355000  | 0.02704000  |
| C                                                           | -0.72796600 | -2.03519500 | -0.00045900 | C                                                                                      | -0.71878700 | -2.00944500 | -0.20344700 |
| H                                                           | -0.79492200 | -2.68560400 | -0.88065800 | H                                                                                      | -0.77139800 | -2.52244300 | -1.17227000 |
| H                                                           | -0.79480700 | -2.68608700 | 0.87937400  | H                                                                                      | -0.78217000 | -2.78281200 | 0.56936700  |
| C                                                           | 0.11504200  | 0.24738800  | -0.00027200 | C                                                                                      | 0.10920800  | 0.30101500  | -0.11236900 |
| C                                                           | 0.55689500  | -1.19656500 | -0.00023800 | C                                                                                      | 0.55726800  | -1.16656500 | -0.09396400 |
| S                                                           | 1.65398800  | -1.22031600 | -1.49474500 | S                                                                                      | 1.82687600  | -1.18849200 | -1.42556800 |
| S                                                           | 1.65292500  | -1.22033100 | 1.49507500  | S                                                                                      | 1.50187500  | -1.26299200 | 1.53108100  |
| C                                                           | 2.38175600  | 0.26650400  | 0.74130100  | C                                                                                      | 2.39107000  | 0.11138500  | 0.91209400  |
| H                                                           | 3.13368100  | 0.80852500  | 1.30590200  | H                                                                                      | 3.01165400  | 0.70408600  | 1.57859500  |
| C                                                           | 2.38226800  | 0.26649700  | -0.74047600 | C                                                                                      | 2.43221700  | 0.29739900  | -0.54657800 |
| H                                                           | 3.13460900  | 0.80850600  | -1.30453200 | H                                                                                      | 3.27622200  | 0.82201000  | -0.98706100 |
| C                                                           | 1.26922100  | 1.11715400  | -0.00005600 | C                                                                                      | 1.20927600  | 1.16487700  | -0.14214100 |
| C                                                           | 1.25231000  | 2.54366200  | -0.00007200 | C                                                                                      | 1.24961600  | 2.57467900  | -0.06509800 |
| H                                                           | 1.29052100  | 4.82249600  | -0.00007700 | H                                                                                      | 1.37086600  | 4.85044400  | 0.03865000  |
| C                                                           | 1.26855200  | 3.75302700  | -0.00007200 | C                                                                                      | 1.31410600  | 3.78312700  | -0.00676100 |
| E(RB3LYP) = -1334.91909149 a.u.<br>Zero imaginary frequency |             |             |             | E(RB3LYP) = -1334.91528419 a.u.<br>One imaginary frequency (-305.91 cm <sup>-1</sup> ) |             |             |             |

| <b>11-IM3</b>                                                                          |             |             |             | <b>11-TS4</b>                                                                          |             |             |             |
|----------------------------------------------------------------------------------------|-------------|-------------|-------------|----------------------------------------------------------------------------------------|-------------|-------------|-------------|
| H                                                                                      | 3.80330000  | -2.29716600 | -0.16005400 | H                                                                                      | 3.67171700  | -2.31051600 | -0.13266800 |
| C                                                                                      | 3.37480500  | -1.30964500 | -0.01338000 | C                                                                                      | 3.27301400  | -1.30258600 | -0.05760400 |
| C                                                                                      | 2.30533700  | 1.30178900  | 0.38755900  | C                                                                                      | 2.28089000  | 1.36002000  | 0.16360300  |
| C                                                                                      | 2.01953600  | -1.07791900 | -0.19779900 | C                                                                                      | 1.92029200  | -1.05110600 | -0.20317800 |
| C                                                                                      | 4.18782800  | -0.23650300 | 0.37816600  | C                                                                                      | 4.13249500  | -0.21828100 | 0.19375100  |
| C                                                                                      | 3.66001400  | 1.05194300  | 0.57853000  | C                                                                                      | 3.64052000  | 1.09396900  | 0.30324100  |
| C                                                                                      | 1.48378100  | 0.22901600  | -0.00243300 | C                                                                                      | 1.41718600  | 0.28062800  | -0.09132800 |
| H                                                                                      | 5.25020200  | -0.40398000 | 0.53091800  | H                                                                                      | 5.19732200  | -0.39954700 | 0.30719600  |
| H                                                                                      | 4.32052000  | 1.85845900  | 0.88167200  | H                                                                                      | 4.33135400  | 1.90847700  | 0.49855800  |
| H                                                                                      | 1.89444200  | 2.29562800  | 0.53072200  | H                                                                                      | 1.89828700  | 2.37217200  | 0.24354200  |
| C                                                                                      | 0.92645000  | -2.05448400 | -0.60065700 | C                                                                                      | 0.78210400  | -2.03107400 | -0.46998000 |
| H                                                                                      | 0.79677800  | -2.84993900 | 0.14580700  | H                                                                                      | 0.71721700  | -2.81332800 | 0.29643800  |
| H                                                                                      | 1.13133100  | -2.54339800 | -1.56192600 | H                                                                                      | 0.88163100  | -2.53436200 | -1.44163500 |
| C                                                                                      | -0.25707000 | -1.12655800 | -0.66693700 | C                                                                                      | -0.37916800 | -1.08176400 | -0.45365500 |
| S                                                                                      | -1.94976900 | -1.38162000 | -0.73532300 | S                                                                                      | -2.15504700 | -1.30490600 | -0.96838000 |
| S                                                                                      | -2.62383700 | -0.85846700 | 1.44378200  | S                                                                                      | -1.92279000 | -1.09154300 | 1.47279700  |
| C                                                                                      | 0.07381500  | 0.16134700  | -0.27624500 | C                                                                                      | -0.01255800 | 0.22687200  | -0.28345000 |
| C                                                                                      | -2.30754700 | 0.45608400  | -0.80667400 | C                                                                                      | -2.46294500 | 0.46816700  | -0.58168400 |
| H                                                                                      | -2.86671400 | 0.85205900  | -1.65164000 | H                                                                                      | -3.22973800 | 0.98013400  | -1.15318200 |
| C                                                                                      | -2.39621600 | 0.72851700  | 0.64294200  | C                                                                                      | -2.22250200 | 0.58792900  | 0.87976000  |
| H                                                                                      | -2.88028200 | 1.59890900  | 1.07659400  | H                                                                                      | -2.76622500 | 1.26298400  | 1.53338600  |
| C                                                                                      | -1.05737400 | 1.09799500  | -0.20401700 | C                                                                                      | -1.14319200 | 1.15106100  | -0.12230200 |
| C                                                                                      | -0.87311900 | 2.50810500  | -0.39800900 | C                                                                                      | -1.03133200 | 2.57632500  | -0.24104700 |
| H                                                                                      | -0.63128300 | 4.75305900  | -0.70644600 | H                                                                                      | -0.88880700 | 4.84272900  | -0.42543800 |
| C                                                                                      | -0.74700500 | 3.69994000  | -0.55787800 | C                                                                                      | -0.95603200 | 3.77891400  | -0.33560500 |
| E(RB3LYP) = -1334.88247660 a.u.<br>Zero imaginary frequency                            |             |             |             | E(RB3LYP) = -1334.83310375 a.u.<br>One imaginary frequency (-575.17 cm <sup>-1</sup> ) |             |             |             |
| <b>11-TS5</b>                                                                          |             |             |             | <b>11-P</b>                                                                            |             |             |             |
| H                                                                                      | 3.81390900  | -2.29977000 | -0.09632700 | H                                                                                      | -4.12807600 | -2.26816900 | 0.29921800  |
| C                                                                                      | 3.38551600  | -1.30913000 | 0.02762300  | C                                                                                      | -3.70778600 | -1.26667000 | 0.26694900  |
| C                                                                                      | 2.31740800  | 1.31100700  | 0.36957500  | C                                                                                      | -2.64655400 | 1.36618900  | 0.18876000  |
| C                                                                                      | 2.03354300  | -1.07800000 | -0.17881200 | C                                                                                      | -2.35173800 | -1.06210000 | 0.04961200  |
| C                                                                                      | 4.19594400  | -0.23069400 | 0.41063200  | C                                                                                      | -4.53261200 | -0.14723800 | 0.44419300  |
| C                                                                                      | 3.66878700  | 1.06259200  | 0.58149600  | C                                                                                      | -4.00832400 | 1.15276500  | 0.40514600  |
| C                                                                                      | 1.49801100  | 0.23263800  | -0.01184000 | C                                                                                      | -1.82155800 | 0.24911900  | 0.01250800  |
| H                                                                                      | 5.25598300  | -0.39764700 | 0.57949900  | H                                                                                      | -5.59569400 | -0.29028100 | 0.61425100  |
| H                                                                                      | 4.32730500  | 1.87292000  | 0.87866000  | H                                                                                      | -4.66962700 | 2.00234700  | 0.54564000  |
| H                                                                                      | 1.90593400  | 2.30748600  | 0.49101500  | H                                                                                      | -2.24156900 | 2.37262700  | 0.16058300  |
| C                                                                                      | 0.94548700  | -2.06154900 | -0.57981800 | C                                                                                      | -1.25914500 | -2.10132600 | -0.17089400 |
| H                                                                                      | 0.80986300  | -2.85111100 | 0.17158700  | H                                                                                      | -1.41784800 | -2.71681400 | -1.06814300 |
| H                                                                                      | 1.15768300  | -2.55888000 | -1.53531500 | H                                                                                      | -1.14473600 | -2.80259900 | 0.66793100  |
| C                                                                                      | -0.24109600 | -1.13928800 | -0.66828400 | C                                                                                      | -0.04547900 | -1.23683200 | -0.32287900 |
| S                                                                                      | -1.91482900 | -1.40218500 | -0.75949100 | S                                                                                      | 4.26427700  | -0.40547600 | 0.89682800  |
| S                                                                                      | -2.70337500 | -0.82023700 | 1.47376400  | S                                                                                      | 1.57811800  | -1.59928600 | -0.56445100 |
| C                                                                                      | 0.09090400  | 0.16728500  | -0.29778000 | C                                                                                      | 1.99965300  | 0.20890500  | -0.63648200 |
| C                                                                                      | -2.28457800 | 0.43547500  | -0.81935600 | C                                                                                      | -0.38550100 | 0.14481500  | -0.22171600 |
| H                                                                                      | -2.82978800 | 0.81804300  | -1.68208800 | C                                                                                      | 0.71046700  | 0.97433000  | -0.37916200 |
| C                                                                                      | -2.46077100 | 0.69659700  | 0.61542800  | C                                                                                      | 3.17359400  | 0.59542100  | 0.25103000  |
| H                                                                                      | -2.86355000 | 1.61690300  | 1.02863000  | H                                                                                      | 2.30737300  | 0.38808600  | -1.68204900 |
| C                                                                                      | -1.02410100 | 1.09086000  | -0.26381000 | H                                                                                      | 3.24698400  | 1.67851500  | 0.38713000  |
| C                                                                                      | -0.86581300 | 2.50228600  | -0.41450500 | C                                                                                      | 0.71077200  | 2.37472300  | -0.35782200 |
| H                                                                                      | -0.66642300 | 4.76043200  | -0.65788400 | H                                                                                      | 0.74872700  | 4.66078500  | -0.33740700 |
| C                                                                                      | -0.76251600 | 3.70164900  | -0.53823800 | C                                                                                      | 0.73356900  | 3.58985000  | -0.34677400 |
| E(RB3LYP) = -1334.89108447 a.u.<br>One imaginary frequency (-304.10 cm <sup>-1</sup> ) |             |             |             | E(RB3LYP) = -1334.94945032 a.u.<br>Zero imaginary frequency                            |             |             |             |
